# Supplementary material for: Cohort profile: The Aboriginal Families Study – a prospective cohort of Aboriginal children and their mothers and caregivers in South Australia
Source: PubMed Central journal article supplement — BMJ Open. 2024 Aug 22;14(8):e082337. doi: 10.1136/bmjopen-2023-082337 (PMC11344498; doi:10.1136/bmjopen-2023-082337), 2024-08-22
Supplement: bmjopen-14-8-s001.pdf [file bmjopen-14-8-s001.pdf]

**Supplemental Table 1. Key Domains assessed in waves 1 and 2 of the Aboriginal Families Study**

| Wave                                                           | Wave 1 (study children aged 4-10 months)                               |                                                                     | Wave 2 (study children aged 5-8 years) |                          |                   |
|----------------------------------------------------------------|------------------------------------------------------------------------|---------------------------------------------------------------------|----------------------------------------|--------------------------|-------------------|
| Assessment Mode                                                | Mothers Questionnaire<br>(pregnancy measures reported retrospectively) | Mothers Questionnaire<br>(postnatal measures reported concurrently) | Mothers Questionnaire                  | Caregivers Questionnaire | Child assessments |
| <b>Social and contextual factors</b>                           |                                                                        |                                                                     |                                        |                          |                   |
| Mothers' date of birth                                         |                                                                        | ◆                                                                   |                                        |                          |                   |
| Mothers' Aboriginal and Torres Strait Islander status          |                                                                        | ◆                                                                   |                                        |                          |                   |
| Mothers' place of residence (urban/regional/remote)            |                                                                        | ◆                                                                   | ◆                                      |                          |                   |
| Mothers' language/cultural group/community                     |                                                                        | ◆                                                                   | ◆                                      |                          |                   |
| Mothers' highest educational qualification                     |                                                                        | ◆                                                                   | ◆                                      |                          |                   |
| Mothers' participation in paid work                            |                                                                        | ◆                                                                   | ◆                                      |                          |                   |
| Mothers' participation in training/study                       |                                                                        | ◆                                                                   | ◆                                      |                          |                   |
|                                                                |                                                                        |                                                                     |                                        |                          |                   |
| Fathers' Aboriginal and Torres Strait Islander status          |                                                                        | ◆                                                                   | ◆                                      |                          |                   |
| Fathers' language/cultural group/community                     |                                                                        | ◆                                                                   | ◆                                      |                          |                   |
| Fathers' highest educational qualification                     |                                                                        | ◆                                                                   | ◆                                      |                          |                   |
| Fathers' participation in paid work                            |                                                                        | ◆                                                                   | ◆                                      |                          |                   |
|                                                                |                                                                        |                                                                     |                                        |                          |                   |
| Primary caregivers' Aboriginal & Torres Strait Islander status |                                                                        |                                                                     |                                        | ◆                        |                   |
| Primary caregivers' language/cultural group/community          |                                                                        |                                                                     |                                        | ◆                        |                   |
| Length of time child living with caregiver                     |                                                                        |                                                                     |                                        | ◆                        |                   |
|                                                                |                                                                        |                                                                     |                                        |                          |                   |
| Housing tenure                                                 |                                                                        | ◆                                                                   | ◆                                      |                          |                   |
| Housing stability                                              |                                                                        | ◆                                                                   | ◆                                      |                          |                   |
| Financial stress (LSIC measure) (17)                           |                                                                        | ◆                                                                   | ◆                                      |                          |                   |
| Stressful events and social health issues                      | ◆                                                                      | ◆                                                                   | ◆                                      |                          |                   |
| Intimate partner violence (AEPVS) (24)                         |                                                                        |                                                                     | ◆                                      |                          |                   |
| Private health insurance                                       |                                                                        | ◆                                                                   | ◆                                      |                          |                   |
| Health care card                                               |                                                                        | ◆                                                                   | ◆                                      |                          |                   |
| Household composition, including other children                |                                                                        | ◆                                                                   | ◆                                      | ◆                        |                   |
| Fathers' involvement in pregnancy                              | ◆                                                                      |                                                                     |                                        |                          |                   |
| Fathers' involvement in caring for study child                 |                                                                        | ◆                                                                   | ◆                                      | ◆                        |                   |
| Other family members' involvement in caring for study child    |                                                                        | ◆                                                                   | ◆                                      | ◆                        |                   |
|                                                                |                                                                        |                                                                     |                                        |                          |                   |
| <b>Maternal health and wellbeing</b>                           |                                                                        |                                                                     |                                        |                          |                   |
| Physical health conditions (e.g diabetes)                      | ◆                                                                      |                                                                     | ◆                                      |                          |                   |
| Psychological distress (K-5) (25)                              |                                                                        | ◆                                                                   | ◆                                      |                          |                   |
| Depressive symptoms (aPHQ9) (27)                               |                                                                        |                                                                     | ◆                                      |                          |                   |
| Anxiety symptoms (GAD-7) (29)                                  |                                                                        |                                                                     | ◆                                      |                          |                   |

|                                                                                         |   |   |   |   |   |
|-----------------------------------------------------------------------------------------|---|---|---|---|---|
| Resilience, strengths, resources (ARRQ) (31)                                            |   |   | ◆ |   |   |
| Dietary information                                                                     |   |   | ◆ |   |   |
| Cigarette smoking                                                                       | ◆ | ◆ | ◆ |   |   |
| Cannabis use                                                                            | ◆ |   | ◆ |   |   |
| Alcohol use (AUDIT 3) (33)                                                              |   |   | ◆ |   |   |
| Use of other substances (Goanna Study measures) (34)                                    |   |   | ◆ |   |   |
| Prescription medications                                                                |   |   | ◆ |   |   |
| <b>Mothers' contact with health services during index pregnancy</b>                     |   |   |   |   |   |
| Model of maternity care                                                                 | ◆ |   |   |   |   |
| Gestation at first pregnancy check-up                                                   | ◆ |   |   |   |   |
| Number of pregnancy check-ups                                                           | ◆ |   |   |   |   |
| Transport to get to pregnancy check-ups                                                 | ◆ |   |   |   |   |
| Experiences of antenatal, intrapartum, postnatal care                                   | ◆ | ◆ |   |   |   |
| Experiences of discrimination and unfair treatment by hospital and health service staff | ◆ | ◆ |   |   |   |
| <b>Mothers' contact with health and social care services after the birth</b>            |   |   |   |   |   |
| Contacts with local doctor/general practitioner                                         |   | ◆ | ◆ |   |   |
| Contacts with Aboriginal health worker                                                  |   | ◆ | ◆ |   |   |
| Contacts with specialist medical practitioners                                          |   | ◆ | ◆ |   |   |
| Contacts with child and family health nurse                                             |   | ◆ | ◆ |   |   |
| Dental check-up/visit in last 12 months                                                 |   |   | ◆ |   |   |
| Hospital admission                                                                      |   | ◆ | ◆ |   |   |
| Emergency department visit                                                              |   | ◆ | ◆ |   |   |
| Hospital clinic visit                                                                   |   | ◆ | ◆ |   |   |
| Social care and advocacy services (e.g. legal services)                                 |   | ◆ | ◆ |   |   |
| <b>Study children's health and wellbeing</b>                                            |   |   |   |   |   |
| Child date of birth                                                                     | ◆ |   |   |   |   |
| Gestation at birth                                                                      | ◆ |   |   |   |   |
| Infant birthweight                                                                      | ◆ |   |   |   |   |
| Common childhood conditions (e.g. ear health conditions)                                |   |   | ◆ | ◆ |   |
| Developmental conditions                                                                |   |   | ◆ | ◆ |   |
| Emotional and behavioural difficulties (SDQ) (36)                                       |   |   | ◆ | ◆ |   |
| Resilience, strengths, resources (CRQ) (35)                                             |   |   | ◆ | ◆ |   |
| Duration of breastfeeding                                                               | ◆ |   |   |   |   |
| Other child dietary information                                                         |   |   | ◆ | ◆ |   |
| Child height and weight, Body Mass Index                                                |   |   | ◆ |   | ◆ |
| Child blood pressure                                                                    |   |   |   |   | ◆ |
| <b>Study children's contact with health services</b>                                    |   |   |   |   |   |
| Infant admission to special care/neonatal intensive care                                | ◆ |   |   |   |   |
| Contacts with local doctor/general practitioner                                         |   | ◆ | ◆ | ◆ |   |

|                                                                                                     |  |   |   |   |   |
|-----------------------------------------------------------------------------------------------------|--|---|---|---|---|
| Contacts with Aboriginal health worker                                                              |  | ◆ | ◆ | ◆ |   |
| Contacts with specialist medical practitioners                                                      |  | ◆ | ◆ | ◆ |   |
| Dental check-up/visit in last 12 months                                                             |  |   | ◆ | ◆ |   |
| Contacts with allied health practitioners                                                           |  |   | ◆ | ◆ |   |
| Hospital admission                                                                                  |  | ◆ | ◆ | ◆ |   |
| Emergency department visit                                                                          |  | ◆ | ◆ | ◆ |   |
| Hospital clinic visit                                                                               |  | ◆ | ◆ | ◆ |   |
| <b>Study children's cognitive and language development</b>                                          |  |   |   |   |   |
| Cognitive function (KBIT (38), NIH Flanker (39), NIH DCCS (40))                                     |  |   |   |   | ◆ |
| Language (Non-word repetition (41), NIH Picture Vocab (39), Story-telling)                          |  |   |   |   | ◆ |
| <b>Kindergarten and school</b>                                                                      |  |   |   |   |   |
| Study child attended kindergarten                                                                   |  |   | ◆ | ◆ |   |
| Study child attended childcare                                                                      |  |   | ◆ | ◆ |   |
| Study child attending school                                                                        |  |   | ◆ | ◆ |   |
| <b>Storytelling, reading and other activities with family</b>                                       |  |   |   |   |   |
| Family read to study child from a book                                                              |  |   | ◆ | ◆ |   |
| Family tell stories to study child                                                                  |  |   | ◆ | ◆ |   |
| Family use Aboriginal English or Aboriginal or Torres Strait Islander language when telling stories |  |   | ◆ | ◆ |   |
| Other activities families do together                                                               |  |   | ◆ | ◆ |   |
| <b>Parenting and caring for children</b>                                                            |  |   |   |   |   |
| Strengths as a parent                                                                               |  |   | ◆ | ◆ |   |
| Values as a parent                                                                                  |  |   | ◆ | ◆ |   |
| Showing children you love them                                                                      |  |   | ◆ | ◆ |   |
| Encouraging children to learn about the world around them                                           |  |   | ◆ | ◆ |   |
| Preparing and supporting children to deal with racism                                               |  |   | ◆ | ◆ |   |
| Encouraging children to learn about family                                                          |  |   | ◆ | ◆ |   |
| Teaching children the right thing to do                                                             |  |   | ◆ | ◆ |   |
| Managing challenging times as a parent                                                              |  |   | ◆ | ◆ |   |
| Support from family, friends and services                                                           |  |   | ◆ | ◆ |   |

AEPVS Aboriginal Women's Experiences of Partner Violence Scale; aPHQ9 adapted Aboriginal version of Patient Health Questionnaire; ARRQ Aboriginal Resilience and Recovery Questionnaire; CRQ-P/C Childhood Resilience Scale – Parent/caregiver version; GAD-7 Generalised Anxiety Disorder Scale; KBIT Kaufman Brief Intelligence Test; K-5 Kessler Scale; HIH- DCCS National Institutes of Health Dimensional Change Card Sort; NIH Flanker National Institutes of Health Flanker Inhibitory Control and Attention Test; SDQ Strengths and Difficulties Questionnaire
